# Supplementary material
Source: MDPI journal article supplement (https://www.mdpi.com/1999-4907/13/2/332)
Supplement: s1 [file s1]

**Table S5 The information of SNP loci**

| Trait | Genome loci | Position | <i>P</i> value | $\log_{10}P$ | $r^2$   | Allele | MAF  |
|-------|-------------|----------|----------------|--------------|---------|--------|------|
| ELDR  | MA_10428216 | 8522     | 7.14E-09       | 8.15         | 0.43747 | T/A    | 0.25 |
|       | MA_10429843 | 14836    | 7.20E-09       | 8.14         | 0.46855 | G/T    | 0.1  |
|       | MA_10434936 | 16639    | 9.92E-09       | 8            | 0.4352  | T/C    | 0.11 |
|       | MA_11137    | 17526    | 8.75E-09       | 8.06         | 0.42545 | G/A    | 0.12 |
|       | MA_119933   | 15072    | 3.41E-09       | 8.47         | 0.45619 | C/A    | 0.08 |
|       | MA_128030   | 4629     | 8.89E-09       | 8.05         | 0.42502 | A/G    | 0.06 |
|       | MA_17692    | 87850    | 1.28E-09       | 8.89         | 0.49373 | G/A    | 0.23 |
|       | MA_19953    | 38054    | 5.50E-09       | 8.26         | 0.45434 | C/T    | 0.13 |
|       | MA_24759    | 9423     | 2.53E-09       | 8.6          | 0.45979 | A/T    | 0.08 |
| EWLR  | MA_101170   | 32445    | 4.84E-09       | 8.31         | 0.44981 | C/T    | 0.06 |
|       | MA_102139   | 8825     | 8.78E-09       | 8.06         | 0.45354 | C/A    | 0.05 |
|       | MA_10303051 | 2008     | 2.59E-09       | 8.59         | 0.49129 | G/A    | 0.11 |
|       | MA_10427040 | 2504     | 6.77E-09       | 8.17         | 0.4684  | A/G    | 0.07 |
|       | MA_10427391 | 58343    | 6.42E-09       | 8.19         | 0.46491 | G/A    | 0.05 |
|       | MA_10428216 | 8522     | 8.88E-10       | 9.05         | 0.49137 | T/A    | 0.25 |
|       | MA_10429843 | 14836    | 1.47E-09       | 8.83         | 0.50048 | G/T    | 0.1  |
|       | MA_10431643 | 12312    | 3.94E-09       | 8.4          | 0.44853 | A/G    | 0.1  |
|       | MA_10432243 | 4619     | 7.27E-09       | 8.14         | 0.4666  | T/A    | 0.06 |
|       | MA_10432762 | 1144     | 7.03E-09       | 8.15         | 0.48376 | G/A    | 0.11 |
|       | MA_10433801 | 64877    | 1.11E-08       | 7.96         | 0.47758 | C/T    | 0.05 |
|       | MA_10434102 | 2975     | 5.32E-09       | 8.27         | 0.47814 | C/T    | 0.05 |
|       | MA_10434378 | 13849    | 3.76E-09       | 8.42         | 0.4487  | G/A    | 0.13 |
|       | MA_10434888 | 24438    | 8.66E-09       | 8.06         | 0.49299 | G/A    | 0.05 |
|       | MA_10434936 | 16639    | 1.30E-09       | 8.89         | 0.48956 | T/C    | 0.11 |
|       | MA_10436608 | 32206    | 4.47E-09       | 8.35         | 0.4663  | G/A    | 0.09 |
|       | MA_10436893 | 3811     | 5.58E-09       | 8.25         | 0.45184 | G/A    | 0.11 |
|       | MA_10437109 | 91706    | 6.03E-09       | 8.22         | 0.48469 | G/C    | 0.14 |
|       | MA_10437270 | 1265     | 3.64E-09       | 8.44         | 0.44965 | G/T    | 0.08 |
|       | MA_10883    | 17064    | 4.02E-09       | 8.4          | 0.4518  | G/A    | 0.05 |
|       | MA_11137    | 17526    | 9.05E-10       | 9.04         | 0.48882 | G/A    | 0.12 |
|       | MA_114300   | 4171     | 3.78E-09       | 8.42         | 0.44859 | A/G    | 0.06 |
|       | MA_114608   | 10192    | 4.71E-09       | 8.33         | 0.47498 | A/T    | 0.07 |
|       | MA_119933   | 15072    | 6.46E-10       | 9.19         | 0.5015  | C/A    | 0.08 |
|       | MA_128030   | 4629     | 9.10E-10       | 9.04         | 0.48866 | A/G    | 0.06 |
|       | MA_140582   | 26903    | 5.39E-09       | 8.27         | 0.48582 | G/C    | 0.07 |
|       | MA_152547   | 8876     | 6.77E-09       | 8.17         | 0.49234 | C/T    | 0.06 |
|       | MA_174203   | 5106     | 7.35E-09       | 8.13         | 0.48393 | A/G    | 0.07 |
|       | MA_176848   | 5098     | 4.43E-09       | 8.35         | 0.44919 | A/T    | 0.1  |
|       | MA_17692    | 87850    | 4.80E-10       | 9.32         | 0.51581 | G/A    | 0.23 |
|       | MA_17795    | 57812    | 3.75E-09       | 8.43         | 0.44877 | T/A    | 0.13 |
|       | MA_182831   | 31133    | 2.94E-09       | 8.53         | 0.45557 | C/T    | 0.21 |
|       | MA_185901   | 19587    | 6.22E-09       | 8.21         | 0.47731 | C/T    | 0.05 |

|     |             |       |          |      |         |     |      |
|-----|-------------|-------|----------|------|---------|-----|------|
| EWT | MA_18721    | 81192 | 8.16E-09 | 8.09 | 0.4657  | C/A | 0.06 |
|     | MA_188095   | 8523  | 4.76E-09 | 8.32 | 0.48496 | C/A | 0.22 |
|     | MA_18827    | 50648 | 3.62E-09 | 8.44 | 0.44979 | A/G | 0.07 |
|     | MA_19301    | 12529 | 3.78E-09 | 8.42 | 0.4486  | A/C | 0.1  |
|     | MA_19724    | 49604 | 1.58E-09 | 8.8  | 0.48767 | G/A | 0.11 |
|     | MA_19953    | 38054 | 9.47E-10 | 9.02 | 0.49812 | C/T | 0.13 |
|     | MA_20154    | 57944 | 4.05E-09 | 8.39 | 0.48186 | C/T | 0.07 |
|     | MA_209710   | 5642  | 1.88E-09 | 8.73 | 0.48956 | A/G | 0.07 |
|     | MA_2292     | 42146 | 3.73E-09 | 8.43 | 0.44891 | G/T | 0.11 |
|     | MA_24759    | 9423  | 5.26E-10 | 9.28 | 0.50436 | A/T | 0.08 |
|     | MA_26989    | 72909 | 3.74E-09 | 8.43 | 0.44884 | C/T | 0.09 |
|     | MA_31       | 18526 | 4.44E-09 | 8.35 | 0.45022 | A/G | 0.08 |
|     | MA_34680    | 847   | 5.12E-09 | 8.29 | 0.47529 | G/A | 0.05 |
|     | MA_370961   | 4804  | 2.85E-09 | 8.55 | 0.4583  | G/A | 0.08 |
|     | MA_377      | 434   | 2.21E-09 | 8.66 | 0.46623 | G/A | 0.06 |
|     | MA_38606    | 11287 | 1.06E-08 | 7.98 | 0.44953 | G/T | 0.07 |
|     | MA_39532    | 29400 | 7.82E-09 | 8.11 | 0.44999 | A/G | 0.06 |
|     | MA_40874    | 54255 | 3.77E-09 | 8.42 | 0.44865 | T/C | 0.15 |
|     | MA_417207   | 5643  | 3.78E-09 | 8.42 | 0.44857 | G/T | 0.05 |
|     | MA_482451   | 5136  | 4.13E-09 | 8.38 | 0.44868 | C/T | 0.23 |
|     | MA_5201     | 12271 | 7.53E-09 | 8.12 | 0.45314 | G/A | 0.1  |
|     | MA_5633     | 10984 | 5.30E-09 | 8.28 | 0.44986 | A/T | 0.06 |
|     | MA_588      | 22351 | 7.53E-09 | 8.12 | 0.44954 | T/A | 0.18 |
|     | MA_607856   | 1004  | 5.17E-09 | 8.29 | 0.49092 | T/G | 0.07 |
|     | MA_66453    | 10916 | 3.75E-09 | 8.43 | 0.44877 | G/A | 0.13 |
|     | MA_72874    | 12702 | 3.78E-09 | 8.42 | 0.4486  | G/C | 0.47 |
|     | MA_74441    | 1579  | 3.78E-09 | 8.42 | 0.44858 | A/T | 0.12 |
|     | MA_80965    | 39315 | 3.78E-09 | 8.42 | 0.4486  | C/G | 0.06 |
|     | MA_8309     | 23795 | 1.24E-09 | 8.91 | 0.48419 | T/C | 0.14 |
|     | MA_88112    | 14863 | 2.22E-09 | 8.65 | 0.47643 | G/A | 0.05 |
|     | MA_9297837  | 6089  | 3.96E-09 | 8.4  | 0.48334 | G/A | 0.07 |
|     | MA_951514   | 3347  | 9.36E-09 | 8.03 | 0.46282 | A/G | 0.06 |
|     | MA_958      | 41171 | 5.53E-09 | 8.26 | 0.45677 | G/T | 0.07 |
|     | MA_99302    | 28542 | 7.09E-09 | 8.15 | 0.51753 | C/T | 0.05 |
|     | MA_10303051 | 2008  | 7.69E-09 | 8.11 | 0.46698 | G/A | 0.11 |
|     | MA_10428216 | 8522  | 6.96E-09 | 8.16 | 0.43736 | T/A | 0.25 |
|     | MA_10429843 | 14836 | 3.12E-09 | 8.51 | 0.48358 | G/T | 0.1  |
|     | MA_10432243 | 4619  | 1.06E-08 | 7.98 | 0.47585 | T/A | 0.06 |
|     | MA_10434936 | 16639 | 3.89E-09 | 8.41 | 0.4602  | T/C | 0.11 |
|     | MA_10883    | 17064 | 1.03E-08 | 7.99 | 0.42597 | G/A | 0.05 |
|     | MA_11137    | 17526 | 7.86E-09 | 8.1  | 0.42839 | G/A | 0.12 |
|     | MA_119933   | 15072 | 4.12E-09 | 8.38 | 0.45104 | C/A | 0.08 |
|     | MA_128030   | 4629  | 7.88E-09 | 8.1  | 0.42832 | A/G | 0.06 |
|     | MA_140582   | 26903 | 1.08E-08 | 7.97 | 0.47691 | G/C | 0.07 |

---

|           |       |          |      |         |     |      |
|-----------|-------|----------|------|---------|-----|------|
| MA_17692  | 87850 | 1.85E-09 | 8.73 | 0.48166 | G/A | 0.23 |
| MA_188095 | 8523  | 8.96E-09 | 8.05 | 0.47635 | C/A | 0.22 |
| MA_19724  | 49604 | 7.02E-09 | 8.15 | 0.45218 | G/A | 0.11 |
| MA_19953  | 38054 | 2.03E-09 | 8.69 | 0.47995 | C/T | 0.13 |
| MA_209710 | 5642  | 4.24E-09 | 8.37 | 0.47141 | A/G | 0.07 |
| MA_24759  | 9423  | 2.04E-09 | 8.69 | 0.46575 | A/T | 0.08 |
| MA_370961 | 4804  | 6.20E-09 | 8.21 | 0.43733 | G/A | 0.08 |
| MA_607856 | 1004  | 5.48E-09 | 8.26 | 0.50128 | T/G | 0.07 |
| MA_8309   | 23795 | 1.90E-09 | 8.72 | 0.47372 | T/C | 0.14 |
| MA_88112  | 14863 | 5.54E-09 | 8.26 | 0.45312 | G/A | 0.05 |

---
