# Supplementary material
Source: MDPI journal article supplement (https://www.mdpi.com/1999-4907/13/2/332)
Supplement: s1 [file s1]

**Table S4 The SLAF tag statistics of *P. crassifolia***

| Sample | SLAF<br>number | Total depth | Average<br>depth/× | Sample | SLAF<br>number | Total<br>depth | Average<br>depth/× |
|--------|----------------|-------------|--------------------|--------|----------------|----------------|--------------------|
| 2      | 283,717        | 7,873,658   | 27.75              | 75     | 634,128        | 17,396,837     | 27.43              |
| 3      | 659,680        | 15,347,986  | 23.27              | 76     | 403,787        | 8,450,911      | 20.93              |
| 4      | 344,102        | 5,229,683   | 15.2               | 77     | 325,372        | 4,842,419      | 14.88              |
| 5      | 482,133        | 10,804,488  | 22.41              | 79     | 350,373        | 6,373,063      | 18.19              |
| 6      | 495,908        | 9,454,803   | 19.07              | 80     | 336,768        | 5,611,089      | 16.66              |
| 7      | 708,255        | 19,752,908  | 27.89              | 82     | 330,756        | 9,563,151      | 28.91              |
| 9      | 371,375        | 6,449,443   | 17.37              | 83     | 356,480        | 9,985,631      | 28.01              |
| 10     | 331,478        | 7,421,661   | 22.39              | 85     | 322,277        | 9,426,340      | 29.25              |
| 11     | 494,355        | 12,659,785  | 25.61              | 87     | 566,876        | 12,911,648     | 22.78              |
| 12     | 376,358        | 5,800,464   | 15.41              | 88     | 607,100        | 18,258,838     | 30.08              |
| 14     | 441,006        | 5,429,629   | 12.31              | 89     | 349,540        | 5,936,414      | 16.98              |
| 15     | 491,444        | 10,983,018  | 22.35              | 90     | 325,755        | 5,236,638      | 16.08              |
| 17     | 325,156        | 5,812,190   | 17.88              | 91     | 403,779        | 9,277,664      | 22.98              |
| 18     | 505,319        | 11,543,410  | 22.84              | 92     | 329,819        | 9,579,711      | 29.05              |
| 19     | 430,073        | 9,550,710   | 22.21              | 93     | 342,438        | 8,918,869      | 26.05              |
| 20     | 305,926        | 3,281,598   | 10.73              | 94     | 644,360        | 6,612,971      | 10.26              |
| 21     | 364,661        | 5,836,862   | 16.01              | 95     | 312,698        | 7,402,699      | 23.67              |
| 22     | 439,626        | 8,824,107   | 20.07              | 96     | 309,093        | 5,190,628      | 16.79              |
| 23     | 415,196        | 6,900,230   | 16.62              | 97     | 544,451        | 14,562,977     | 26.75              |
| 25     | 473,236        | 7,799,968   | 16.48              | 98     | 429,471        | 10,039,734     | 23.38              |
| 26     | 316,568        | 3,134,561   | 9.9                | 101    | 464,833        | 11,586,985     | 24.93              |
| 27     | 437,772        | 9,622,570   | 21.98              | 103    | 383,368        | 5,938,816      | 15.49              |
| 28     | 428,672        | 8,121,110   | 18.94              | 105    | 330,137        | 6,307,582      | 19.11              |
| 30     | 300,021        | 3,266,162   | 10.89              | 106    | 282,123        | 2,996,839      | 10.62              |
| 31     | 310,233        | 6,894,152   | 22.22              | 107    | 336,957        | 4,845,120      | 14.38              |
| 32     | 450,419        | 7,617,695   | 16.91              | 108    | 333,343        | 9,067,734      | 27.2               |
| 33     | 318,282        | 4,496,327   | 14.13              | 109    | 363,929        | 8,027,585      | 22.06              |
| 34     | 423,593        | 13,973,551  | 32.99              | 111    | 363,390        | 5,668,890      | 15.6               |
| 35     | 424,551        | 7,498,549   | 17.66              | 116    | 374,221        | 5,291,881      | 14.14              |
| 36     | 270,596        | 2,815,411   | 10.4               | 118    | 356,171        | 10,005,848     | 28.09              |
| 39     | 336,312        | 7,935,385   | 23.6               | 123    | 369,445        | 5,619,881      | 15.21              |
| 42     | 395,383        | 6,185,133   | 15.64              | 124    | 314,201        | 5,204,019      | 16.56              |
| 45     | 319,732        | 5,801,761   | 18.15              | 125    | 436,450        | 12,148,040     | 27.83              |
| 48     | 302,612        | 6,537,445   | 21.6               | 128    | 519,047        | 15,632,012     | 30.12              |
| 49     | 297,968        | 7,990,841   | 26.82              | 130    | 319,221        | 3,423,360      | 10.72              |
| 51     | 270,600        | 6,709,651   | 24.8               | 132    | 305,735        | 11,260,150     | 36.83              |
| 52     | 699,363        | 12,170,897  | 17.4               | 133    | 353,696        | 9,479,624      | 26.8               |
| 54     | 610,820        | 7,354,427   | 12.04              | 135    | 423,032        | 9,580,803      | 22.65              |
| 55     | 316,164        | 4,628,653   | 14.64              | 138    | 366,512        | 9,298,310      | 25.37              |
| 56     | 398,646        | 9,299,796   | 23.33              | 140    | 296,040        | 5,719,814      | 19.32              |
| 57     | 367,385        | 13,590,078  | 36.99              | 142    | 349,964        | 6,995,137      | 19.99              |

|    |         |            |       |     |         |            |       |
|----|---------|------------|-------|-----|---------|------------|-------|
| 60 | 334,384 | 5,958,739  | 17.82 | 145 | 345,367 | 8,712,936  | 25.23 |
| 61 | 308,031 | 7,192,502  | 23.35 | 146 | 284,569 | 7,445,141  | 26.16 |
| 62 | 338,272 | 7,458,343  | 22.05 | 148 | 347,636 | 7,280,860  | 20.94 |
| 64 | 424,361 | 8,729,259  | 20.57 | 150 | 305,218 | 9,867,284  | 32.33 |
| 66 | 310,171 | 5,713,877  | 18.42 | 152 | 319,674 | 5,823,188  | 18.22 |
| 67 | 345,644 | 4,710,390  | 13.63 | 153 | 475,857 | 14,030,436 | 29.48 |
| 68 | 422,843 | 8,621,261  | 20.39 | 154 | 356,950 | 8,542,542  | 23.93 |
| 69 | 328,370 | 5,232,840  | 15.94 | 155 | 325,592 | 6,509,041  | 19.99 |
| 70 | 563,993 | 14,204,545 | 25.19 | 156 | 426,427 | 8,758,461  | 20.54 |
| 71 | 439,168 | 14,049,337 | 31.99 | 158 | 308,212 | 10,467,617 | 33.96 |
| 72 | 368,468 | 4,907,444  | 13.32 | 161 | 320,028 | 12,378,938 | 38.68 |
| 73 | 327,831 | 4,977,618  | 15.18 | 164 | 353,721 | 8,651,293  | 24.46 |
