# Supplementary material
Source: MDPI journal article supplement (https://www.mdpi.com/1999-4907/13/2/332)
Supplement: s1 [file s1]

**Table S2 The sequencing result of *P. crassifolia***

| Sample | Reads number | GC         | Q30        | Sample | Reads number | GC         | Q30        |
|--------|--------------|------------|------------|--------|--------------|------------|------------|
|        |              | Percentage | Percentage |        |              | Percentage | Percentage |
|        |              | /%         | /%         |        |              | /%         | /%         |
| 2      | 12,146,243   | 39.66      | 97.34      | 75     | 27,070,087   | 40.57      | 94.28      |
| 3      | 24,241,911   | 40.45      | 92.31      | 76     | 13,240,839   | 40.53      | 93.85      |
| 4      | 8,152,218    | 41.63      | 93.37      | 77     | 7,634,863    | 40.79      | 94.37      |
| 5      | 16,862,228   | 40.43      | 94.15      | 79     | 10,089,736   | 40.3       | 94.13      |
| 6      | 14,751,714   | 40.16      | 93.61      | 80     | 8,736,905    | 40.67      | 93.46      |
| 7      | 30,427,534   | 40.59      | 94.21      | 82     | 14,917,563   | 39.95      | 97.1       |
| 9      | 10,048,409   | 40.65      | 94.02      | 83     | 15,371,612   | 39.73      | 97.82      |
| 10     | 11,555,933   | 39.78      | 97.68      | 85     | 14,684,553   | 39.68      | 97.3       |
| 11     | 19,330,765   | 39.94      | 93.09      | 87     | 20,033,110   | 39.34      | 97.57      |
| 12     | 8,841,081    | 40.21      | 94.52      | 88     | 28,707,808   | 39.65      | 97.71      |
| 14     | 8,576,004    | 40.6       | 93.99      | 89     | 9,351,352    | 40.3       | 93.38      |
| 15     | 17,319,977   | 41         | 93.19      | 90     | 8,111,089    | 40.14      | 93.35      |
| 17     | 8,990,525    | 39.73      | 97.52      | 91     | 14,487,381   | 40.19      | 93.43      |
| 18     | 18,189,255   | 40.65      | 93.17      | 92     | 14,917,678   | 39.53      | 97.63      |
| 19     | 14,768,755   | 40.08      | 93.98      | 93     | 13,759,732   | 39.9       | 97.61      |
| 20     | 5,030,643    | 40.45      | 94.28      | 94     | 10,413,249   | 39.48      | 97.57      |
| 21     | 9,138,350    | 40.64      | 93.87      | 95     | 11,396,311   | 39.62      | 97.74      |
| 22     | 13,998,204   | 41.42      | 94.11      | 96     | 8,028,318    | 39.67      | 97.54      |
| 23     | 10,909,007   | 40.73      | 92.91      | 97     | 22,758,710   | 39.97      | 92.5       |
| 25     | 12,353,762   | 41.39      | 93.38      | 98     | 15,850,692   | 39.19      | 97.67      |
| 26     | 4,800,937    | 40.3       | 94.25      | 101    | 18,092,780   | 40.2       | 93.55      |
| 27     | 15,072,877   | 40.81      | 93.43      | 103    | 9,349,642    | 41.09      | 93.82      |
| 28     | 12,689,902   | 40.38      | 93.76      | 105    | 9,812,558    | 40.02      | 94.24      |
| 30     | 5,167,434    | 42.14      | 94.46      | 106    | 4,556,284    | 40.13      | 94.55      |
| 31     | 10,644,008   | 39.75      | 97.67      | 107    | 7,358,455    | 40.11      | 94.43      |
| 32     | 12,885,735   | 43.62      | 92.31      | 108    | 13,981,084   | 40.04      | 97.81      |
| 33     | 6,805,875    | 40.1       | 94.39      | 109    | 12,592,356   | 41.23      | 97.58      |
| 34     | 21,616,266   | 40.13      | 97.79      | 111    | 8,842,740    | 40.45      | 93.98      |
| 35     | 11,611,262   | 40.77      | 93.93      | 116    | 8,385,599    | 41.02      | 94.01      |
| 36     | 4,411,192    | 40.76      | 93.78      | 118    | 15,464,622   | 39.86      | 97.77      |
| 39     | 12,226,428   | 39.98      | 97.7       | 123    | 8,839,070    | 39.19      | 97.62      |
| 42     | 9,675,424    | 41.5       | 94.28      | 124    | 8,077,398    | 40.49      | 93.26      |
| 45     | 9,145,446    | 40.71      | 93.51      | 125    | 19,127,204   | 41.42      | 93.77      |
| 48     | 10,170,557   | 39.52      | 97.4       | 128    | 24,215,373   | 39.61      | 94.39      |
| 49     | 12,403,724   | 39.82      | 97.63      | 130    | 5,449,712    | 41.56      | 94.05      |
| 51     | 10,368,220   | 39.57      | 97.43      | 132    | 17,452,700   | 40.03      | 97.41      |
| 52     | 19,183,107   | 39.58      | 97.51      | 133    | 14,656,193   | 39.81      | 97.7       |
| 54     | 11,692,092   | 39.59      | 97.71      | 135    | 14,908,559   | 40.97      | 94.36      |
| 55     | 7,235,883    | 39.88      | 97.48      | 138    | 14,464,740   | 40.72      | 94.16      |
| 56     | 14,602,000   | 39.71      | 97.54      | 140    | 8,795,260    | 39.42      | 97.66      |

|    |            |       |       |     |            |       |       |
|----|------------|-------|-------|-----|------------|-------|-------|
| 57 | 21,325,095 | 40.15 | 97.41 | 142 | 10,900,920 | 40.73 | 93.51 |
| 60 | 9,268,409  | 39.98 | 97.64 | 145 | 13,401,810 | 39.79 | 97.75 |
| 61 | 11,063,287 | 39.65 | 97.78 | 146 | 11,524,254 | 39.64 | 97.51 |
| 62 | 11,532,628 | 39.77 | 97.78 | 148 | 11,297,193 | 40.15 | 97.44 |
| 64 | 13,724,591 | 40.12 | 97.33 | 150 | 15,421,893 | 39.73 | 97.45 |
| 66 | 8,816,718  | 39.73 | 97.73 | 152 | 9,091,753  | 40.62 | 94.4  |
| 67 | 7,304,810  | 40.9  | 94.39 | 153 | 21,765,056 | 40.38 | 97.64 |
| 68 | 13,542,675 | 40.85 | 92.67 | 154 | 13,367,005 | 40.33 | 97.55 |
| 69 | 8,165,970  | 40.08 | 97.2  | 155 | 10,172,094 | 40.41 | 97.63 |
| 70 | 22,365,733 | 40.65 | 92.75 | 156 | 13,494,970 | 39.21 | 97.79 |
| 71 | 21,941,923 | 40.17 | 90.97 | 158 | 16,212,064 | 39.49 | 97.74 |
| 72 | 7,773,989  | 41.66 | 94.24 | 161 | 19,033,231 | 39.74 | 97.68 |
| 73 | 7,717,213  | 40.03 | 93.11 | 164 | 13,327,258 | 39.19 | 97.82 |
