# Supplementary material
Source: MDPI journal article supplement (https://www.mdpi.com/1999-4907/13/2/332)
Supplement: s1 [file s1]

**Table S3 SNP information statistics of *P. crassifolia***

| Group | Clone<br>accession | SNP<br>number | Integrity<br>/% | Hetloci<br>ratio/% | Group | Clone<br>accession | SNP number | Integrity<br>/% | Hetloci<br>ratio/% |
|-------|--------------------|---------------|-----------------|--------------------|-------|--------------------|------------|-----------------|--------------------|
| DDS   | 92                 | 2,267,242     | 18.47           | 9.15               | LCH   | 66                 | 2,134,550  | 17.39           | 8.99               |
| DDS   | 93                 | 2,348,631     | 19.13           | 9.14               | LCH   | 69                 | 2,252,820  | 18.35           | 8.94               |
| DDS   | 95                 | 2,139,811     | 17.43           | 8.81               | LCH   | 154                | 2,466,491  | 20.09           | 9.72               |
| DDS   | 96                 | 2,120,259     | 17.27           | 9.08               | LCH   | 155                | 2,218,384  | 18.07           | 8.88               |
| DDS   | 98                 | 2,564,309     | 20.89           | 6.67               | LCH   | 156                | 2,737,463  | 22.30           | 8.11               |
| DDS   | 94                 | 3,606,123     | 29.38           | 8.47               | LCH   | 158                | 2,117,277  | 17.25           | 7.96               |
| DDS   | 89                 | 2,389,125     | 19.46           | 7.24               | LCH   | 153                | 3,065,469  | 24.97           | 8.70               |
| DDS   | 90                 | 2,193,067     | 17.87           | 6.88               | LCH   | 67                 | 2,397,443  | 19.53           | 7.18               |
| DDS   | 91                 | 2,656,046     | 21.64           | 7.34               | LCH   | 68                 | 2,925,591  | 23.83           | 9.08               |
| DDS   | 97                 | 3,541,604     | 28.85           | 9.12               | LCH   | 75                 | 4,136,952  | 33.70           | 9.80               |
| DHK   | 109                | 2,525,069     | 20.57           | 9.42               | LC    | 39                 | 2,316,925  | 18.87           | 8.84               |
| DHK   | 76                 | 2,717,377     | 22.14           | 5.76               | LC    | 48                 | 2,090,766  | 17.03           | 9.28               |
| DHK   | 77                 | 2,217,145     | 18.06           | 7.03               | LC    | 51                 | 1,890,934  | 15.40           | 8.42               |
| DHK   | 105                | 2,222,120     | 18.10           | 6.81               | LC    | 54                 | 3,291,325  | 26.81           | 7.87               |
| DHK   | 106                | 1,939,562     | 15.80           | 6.45               | LC    | 55                 | 2,156,368  | 17.57           | 8.88               |
| DHK   | 111                | 2,431,938     | 19.81           | 7.25               | LC    | 60                 | 2,272,844  | 18.51           | 9.29               |
| DHK   | 124                | 2,159,104     | 17.59           | 6.92               | LC    | 61                 | 2,102,345  | 17.13           | 8.59               |
| DHK   | 125                | 3,014,132     | 24.55           | 8.47               | LC    | 62                 | 2,332,513  | 19.00           | 9.23               |
| DHS   | 31                 | 2,128,003     | 17.33           | 8.80               | LC    | 64                 | 2,844,988  | 23.18           | 9.43               |
| DHS   | 82                 | 2,286,061     | 18.62           | 8.11               | LC    | 52                 | 4,049,531  | 32.99           | 8.99               |
| DHS   | 83                 | 2,430,707     | 19.80           | 9.06               | LC    | 56                 | 2,587,466  | 21.08           | 7.95               |
| DHS   | 23                 | 2,898,300     | 23.61           | 8.49               | LC    | 49                 | 2,074,937  | 16.90           | 8.40               |
| DHS   | 25                 | 3,261,249     | 26.57           | 9.47               | LC    | 57                 | 2,558,408  | 20.84           | 9.02               |
| DHS   | 26                 | 2,145,298     | 17.48           | 6.49               | LC    | 42                 | 2,761,907  | 22.50           | 8.36               |
| DHS   | 27                 | 3,058,956     | 24.92           | 8.93               | LC    | 45                 | 2,185,404  | 17.80           | 6.15               |
| DHS   | 28                 | 2,956,993     | 24.09           | 8.62               | XS    | 108                | 2,301,940  | 18.75           | 8.35               |
| DHS   | 30                 | 2,099,746     | 17.10           | 6.67               | XS    | 118                | 2,429,920  | 19.79           | 9.23               |
| DHS   | 79                 | 2,366,746     | 19.28           | 7.24               | XS    | 123                | 2,303,375  | 18.76           | 6.68               |
| DHS   | 80                 | 2,282,147     | 18.59           | 6.86               | XS    | 133                | 2,433,809  | 19.83           | 9.36               |
| GC    | 17                 | 2,201,266     | 17.93           | 9.06               | XS    | 140                | 2,032,448  | 16.56           | 8.58               |
| GC    | 14                 | 2,950,389     | 24.03           | 8.62               | XS    | 145                | 2,363,702  | 19.26           | 9.27               |
| GC    | 15                 | 3,267,024     | 26.61           | 9.08               | XS    | 146                | 1,971,986  | 16.06           | 8.18               |
| GC    | 18                 | 3,377,556     | 27.51           | 8.86               | XS    | 148                | 2,378,440  | 19.38           | 9.11               |
| GC    | 19                 | 2,828,634     | 23.04           | 7.60               | XS    | 150                | 2,123,625  | 17.30           | 8.35               |
| GC    | 20                 | 2,090,116     | 17.03           | 6.36               | XS    | 161                | 2,208,835  | 17.99           | 8.50               |
| GC    | 21                 | 2,475,276     | 20.16           | 7.20               | XS    | 164                | 2,321,578  | 18.91           | 7.34               |
| GC    | 22                 | 3,052,930     | 24.87           | 9.11               | XS    | 87                 | 3,338,208  | 27.19           | 7.88               |
| HX    | 10                 | 2,251,295     | 18.34           | 8.95               | XS    | 88                 | 3,531,028  | 28.76           | 8.70               |
| HX    | 2                  | 1,971,193     | 16.06           | 7.69               | XS    | 85                 | 2,242,174  | 18.27           | 8.32               |

|    |    |           |       |       |     |     |           |       |      |
|----|----|-----------|-------|-------|-----|-----|-----------|-------|------|
| HX | 3  | 4,136,822 | 33.70 | 9.52  | XS  | 101 | 3,007,490 | 24.50 | 8.63 |
| HX | 4  | 2,396,731 | 19.52 | 8.27  | XS  | 103 | 2,710,974 | 22.08 | 9.07 |
| HX | 5  | 3,108,723 | 25.32 | 7.76  | XS  | 107 | 2,352,208 | 19.16 | 7.60 |
| HX | 6  | 3,178,543 | 25.89 | 7.92  | XS  | 116 | 2,573,445 | 20.96 | 7.21 |
| HX | 7  | 4,487,841 | 36.56 | 10.99 | XS  | 135 | 2,927,258 | 23.85 | 8.41 |
| HX | 9  | 2,533,393 | 20.64 | 7.59  | XS  | 138 | 2,546,908 | 20.75 | 7.98 |
| HX | 11 | 3,241,100 | 26.40 | 9.10  | XS  | 142 | 2,439,976 | 19.88 | 7.85 |
| HX | 12 | 2,522,359 | 20.55 | 7.28  | XS  | 152 | 2,152,132 | 17.53 | 6.54 |
| QL | 34 | 2,858,436 | 23.29 | 9.14  | SDL | 132 | 2,132,709 | 17.37 | 5.41 |
| QL | 32 | 3,058,296 | 24.91 | 8.95  | XYH | 70  | 3,739,016 | 30.46 | 9.51 |
| QL | 33 | 2,144,399 | 17.47 | 6.63  | XYH | 71  | 3,043,281 | 24.79 | 8.62 |
| QL | 35 | 2,906,011 | 23.67 | 8.17  | XYH | 72  | 2,476,112 | 20.17 | 6.96 |
| QL | 36 | 1,915,028 | 15.60 | 6.53  | XYH | 73  | 2,248,977 | 18.32 | 7.24 |
