# Supplementary material
Source: MDPI journal article supplement (https://www.mdpi.com/1999-4907/13/2/332)
Supplement: s1 [file s1]

**Table S1 The information of 106 clones in *P. crassifolia***

| Number of the clones | Provenances in Gansu Province, China |
|----------------------|--------------------------------------|
| 2                    | Ha Xi clonal seed orchard            |
| 3                    | Ha Xi clonal seed orchard            |
| 4                    | Ha Xi clonal seed orchard            |
| 5                    | Ha Xi clonal seed orchard            |
| 6                    | Ha Xi clonal seed orchard            |
| 7                    | Ha Xi clonal seed orchard            |
| 9                    | Ha Xi clonal seed orchard            |
| 10                   | Ha Xi clonal seed orchard            |
| 11                   | Ha Xi clonal seed orchard            |
| 12                   | Ha Xi clonal seed orchard            |
| 14                   | Gu Cheng clonal seed orchard         |
| 15                   | Gu Cheng clonal seed orchard         |
| 17                   | Gu Cheng clonal seed orchard         |
| 18                   | Gu Cheng clonal seed orchard         |
| 19                   | Gu Cheng clonal seed orchard         |
| 20                   | Gu Cheng clonal seed orchard         |
| 21                   | Gu Cheng clonal seed orchard         |
| 22                   | Gu Cheng clonal seed orchard         |
| 23                   | Da Huangshan clonal seed orchard     |
| 25                   | Da Huangshan clonal seed orchard     |
| 26                   | Da Huangshan clonal seed orchard     |
| 27                   | Da Huangshan clonal seed orchard     |
| 28                   | Da Huangshan clonal seed orchard     |
| 30                   | Da Hekou clonal seed orchard         |
| 31                   | Da Hekou clonal seed orchard         |
| 32                   | Qi Lian clonal seed orchard          |
| 33                   | Qi Lian clonal seed orchard          |
| 34                   | Qi Lian clonal seed orchard          |
| 35                   | Qi Lian clonal seed orchard          |
| 36                   | Qi Lian clonal seed orchard          |
| 39                   | Lian Cheng clonal seed orchard       |
| 42                   | Lian Cheng clonal seed orchard       |
| 45                   | Lian Cheng clonal seed orchard       |
| 48                   | Lian Cheng clonal seed orchard       |
| 49                   | Lian Cheng clonal seed orchard       |
| 50                   | Lian Cheng clonal seed orchard       |
| 51                   | Lian Cheng clonal seed orchard       |
| 52                   | Lian Cheng clonal seed orchard       |
| 54                   | Lian Cheng clonal seed orchard       |
| 55                   | Lian Cheng clonal seed orchard       |
| 56                   | Lian Cheng clonal seed orchard       |
| 57                   | Lian Cheng clonal seed orchard       |

---

|     |                                  |
|-----|----------------------------------|
| 60  | Lian Cheng clonal seed orchard   |
| 61  | Lian Cheng clonal seed orchard   |
| 62  | Lian Cheng clonal seed orchard   |
| 64  | Lian Cheng clonal seed orchard   |
| 66  | Long Changhe clonal seed orchard |
| 67  | Long Changhe clonal seed orchard |
| 68  | Long Changhe clonal seed orchard |
| 69  | Long Changhe clonal seed orchard |
| 70  | Xi Yinghe clonal seed orchard    |
| 71  | Xi Yinghe clonal seed orchard    |
| 72  | Xi Yinghe clonal seed orchard    |
| 73  | Xi Yinghe clonal seed orchard    |
| 75  | Long Changhe clonal seed orchard |
| 76  | Da Hekou clonal seed orchard     |
| 77  | Da Huangshan clonal seed orchard |
| 79  | Da Huangshan clonal seed orchard |
| 80  | Da Huangshan clonal seed orchard |
| 82  | Da Huangshan clonal seed orchard |
| 83  | Da Huangshan clonal seed orchard |
| 85  | Xi Shui clonal seed orchard      |
| 87  | Xi Shui clonal seed orchard      |
| 88  | Xi Shui clonal seed orchard      |
| 89  | Dong Dashan clonal seed orchard  |
| 90  | Dong Dashan clonal seed orchard  |
| 91  | Dong Dashan clonal seed orchard  |
| 92  | Dong Dashan clonal seed orchard  |
| 93  | Dong Dashan clonal seed orchard  |
| 94  | Dong Dashan clonal seed orchard  |
| 95  | Dong Dashan clonal seed orchard  |
| 96  | Dong Dashan clonal seed orchard  |
| 97  | Dong Dashan clonal seed orchard  |
| 98  | Dong Dashan clonal seed orchard  |
| 101 | Xi Shui clonal seed orchard      |
| 103 | Xi Shui clonal seed orchard      |
| 105 | Da Hekou clonal seed orchard     |
| 106 | Da Hekou clonal seed orchard     |
| 107 | Xi Shui clonal seed orchard      |
| 108 | Xi Shui clonal seed orchard      |
| 109 | Da Hekou clonal seed orchard     |
| 111 | Da Hekou clonal seed orchard     |
| 116 | Xi Shui clonal seed orchard      |
| 118 | Xi Shui clonal seed orchard      |
| 123 | Xi Shui clonal seed orchard      |
| 124 | Da Hekou clonal seed orchard     |

---

---

|     |                                  |
|-----|----------------------------------|
| 125 | Da Hekou clonal seed orchard     |
| 126 | Da Hekou clonal seed orchard     |
| 128 | Gu Cheng clonal seed orchard     |
| 130 | Gu Cheng clonal seed orchard     |
| 132 | Xi Shui clonal seed orchard      |
| 133 | Xi Shui clonal seed orchard      |
| 135 | Xi Shui clonal seed orchard      |
| 138 | Xi Shui clonal seed orchard      |
| 140 | Xi Shui clonal seed orchard      |
| 142 | Xi Shui clonal seed orchard      |
| 145 | Xi Shui clonal seed orchard      |
| 146 | Xi Shui clonal seed orchard      |
| 148 | Xi Shui clonal seed orchard      |
| 150 | Xi Shui clonal seed orchard      |
| 152 | Xi Shui clonal seed orchard      |
| 153 | Long Changhe clonal seed orchard |
| 154 | Long Changhe clonal seed orchard |
| 155 | Long Changhe clonal seed orchard |
| 156 | Long Changhe clonal seed orchard |
| 158 | Long Changhe clonal seed orchard |
| 161 | Xi Shui clonal seed orchard      |
| 164 | Xi Shui clonal seed orchard      |

---
